# Supplementary material for: Combining probability distributions of sea level variations and wave run-up to evaluate coastal flooding risks
Source: Copernicus journal article supplement (doi:10.5194/nhess-18-2785-2018), 2018-10-24
Supplement: Supplementary file 1 [file nhess-18-2785-2018-supplement.zip]

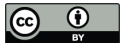

## *Supplement of*

# **Combining probability distributions of sea level variations and wave run-up to evaluate coastal flooding risks**

**Ulpu Leijala et al.**

*Correspondence to:* Ulpu Leijala ([ulpu.leijala@fmi.fi](mailto:ulpu.leijala@fmi.fi))

- [nhess-18-2785-2018-supplement-title-page.pdf](#)
- [GoF\\_Wave\\_data.txt](#)
- [Helsinki\\_Sea\\_level\\_data.txt](#)
- [Jatkasaari\\_Wave\\_data.txt](#)
- [Lansikari\\_Wave\\_data.txt](#)
- [readme.txt](#)

The copyright of individual parts of the supplement might differ from the CC BY 4.0 License.
